# Supplementary material for: Fear extinction relies on ventral hippocampal safety codes shaped by the amygdala
Source: PubMed Central journal article supplement — Sci Adv. 2023 May 31;9(22):eadg4881. doi: 10.1126/sciadv.adg4881 (PMC10413664; doi:10.1126/sciadv.adg4881), 2023-05-31
Supplement: sciadv.adg4881_sm.pdf [file sciadv.adg4881_sm.pdf]

Supplementary Materials for

**Fear extinction relies on ventral hippocampal safety codes shaped by the amygdala**

Robin Nguyen *et al.*

Corresponding author: Stéphane Ciochi, [stephane.ciochi@unibe.ch](mailto:stephane.ciochi@unibe.ch); Robin Nguyen, [rn2560@columbia.edu](mailto:rn2560@columbia.edu)

*Sci. Adv.* **9**, eadg4881 (2023)  
DOI: 10.1126/sciadv.adg4881

**This PDF file includes:**

Figs. S1 to S5

**Figure S1**

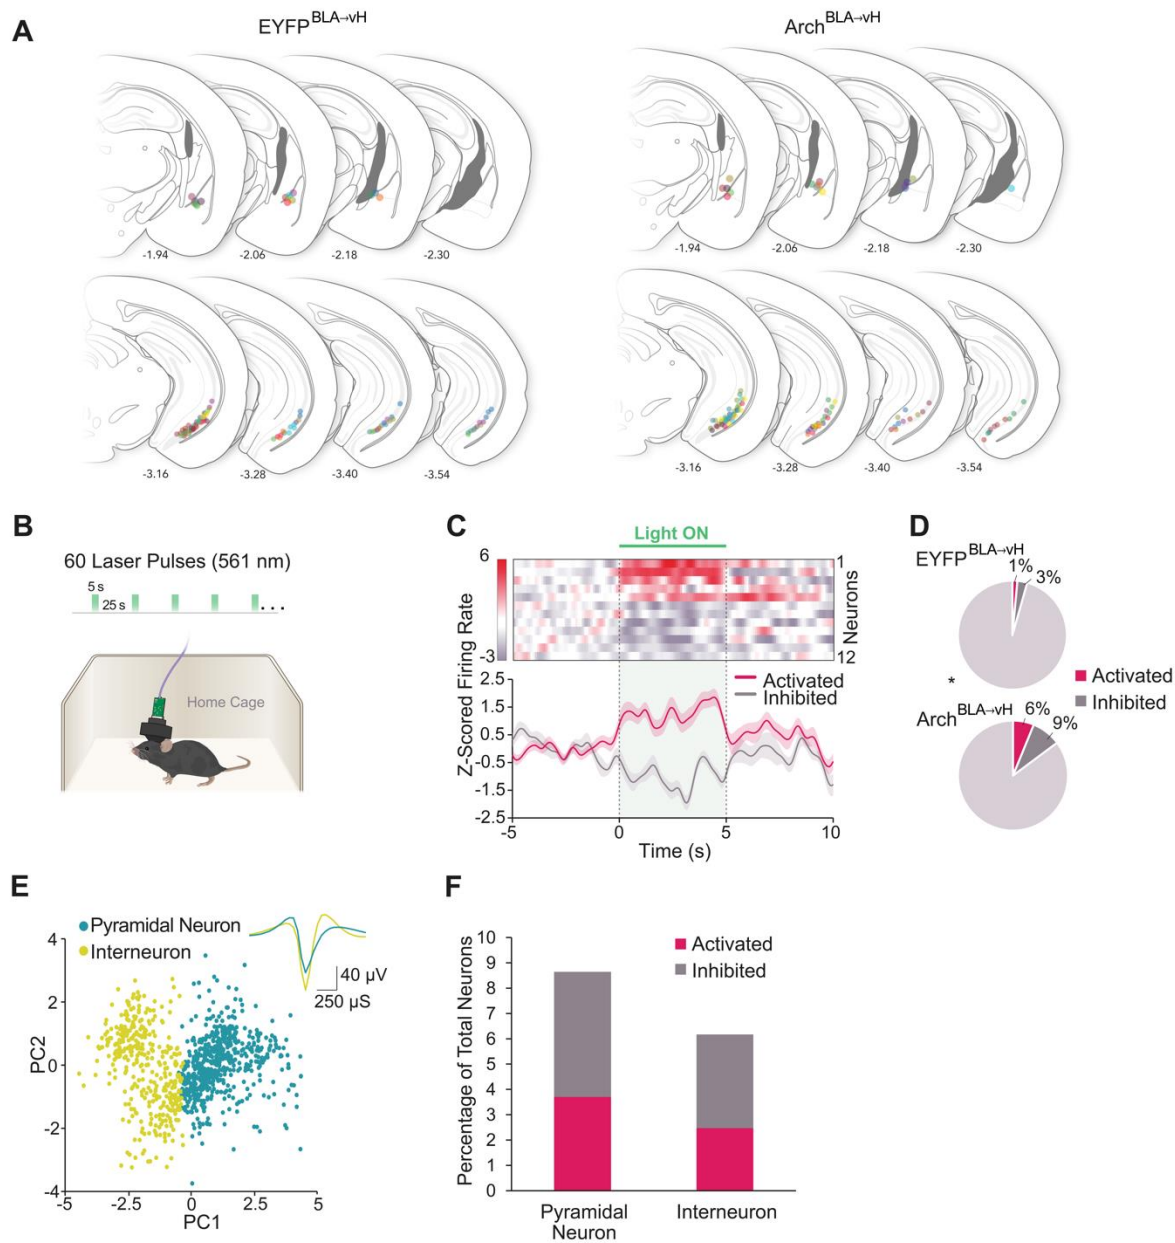

**Fig. S1. Optogenetic inhibition of BLA neurons projecting to vH alters vH neuronal activity.** (A) Histologically verified placements of optic fibres in the BLA and tetrodes in vH for EYFP<sup>BLA→vH</sup> (left,  $n = 15$ ) and Arch<sup>BLA→vH</sup> (right,  $n = 15$ ) mice. (B) Schematic of experimental protocol for laser stimulation in the home cage. Mice received 60 light pulses of 5 s duration separated by 25 s. (C) Top, peri-stimulus time histogram heatmaps of trial-averaged responses of laser-activated and -inhibited neurons in the vH of Arch<sup>BLA→vH</sup> mice. Dashed lines mark the laser onset and offset. Bottom, Averaged responses of laser-activated and -inhibited neurons across trial time. (D) Percentage of laser-activated and laser-inhibited neurons out of total neurons. Difference in counts of responsive and non-responsive neurons between groups:  $\chi^2_{(1, N=149)} = 4.42$ ,  $P = 0.0355$ , Chi-square test. C-D, EYFP<sup>BLA→vH</sup>  $n = 68$  neurons from 4 mice, Arch<sup>BLA→vH</sup>  $n = 81$  neurons from 4 mice. (E) Plot of principal components 1 and 2 for analysis of variation in spike waveforms. Points correspond to neurons color-coded by cluster membership assigned through  $K$ -means clustering of waveforms ( $K = 2$ ). Inset: average spike waveforms of putative pyramidal neurons and interneurons. (F) Percentage of laser-activated and -inhibited neurons out of total pyramidal neurons or interneurons for Arch<sup>BLA→vH</sup> mice. Difference in counts of activated and inhibited neurons between neuronal classes:  $\chi^2_{(1, N=12)} = 0.01$ ,  $P = 0.92$ , Chi-square test. E-F, EYFP<sup>BLA→vH</sup>  $n = 179$  neurons from 15 mice, Arch<sup>BLA→vH</sup>  $n = 185$  neurons from 15 mice.

**Figure S2**

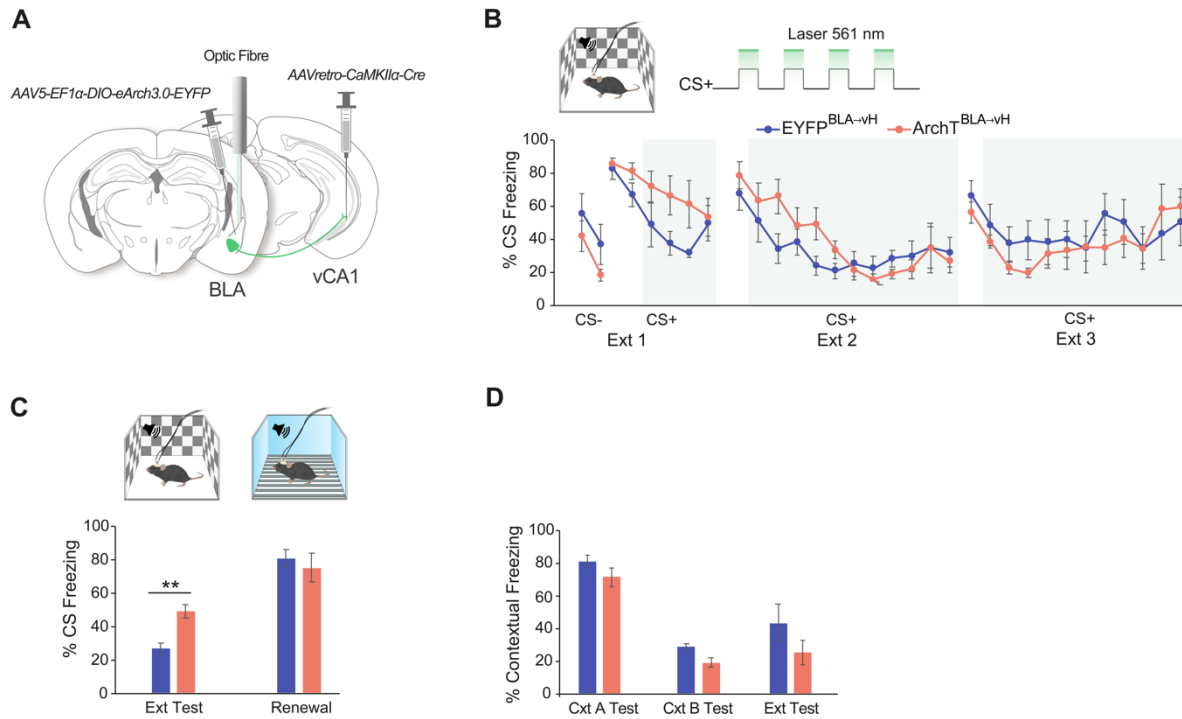

**Fig. S2. Somatic optogenetic inhibition of BLA-vH neurons during extinction impairs extinction memory formation.** (A) Schematic of optogenetic BLA-vH somatic inhibition strategy showing viral infusions in the BLA and vH, and optic fibre implantation the BLA. (B) Top, context B illustration and paradigm for laser light delivery during the CS-period of Ext sessions. Bottom, percent CS freezing across Ext training sessions shown as 2-trial averaged blocks. Shaded area indicates light-on trial blocks. Ext 1  $F_{(1,9)} = 0.66$ ,  $P = 0.4$ ; Ext 2  $F_{(1,9)} = 0.47$ ,  $P = 0.5$ ; Ext 3  $F_{(1,9)} = 0.19$ ,  $P = 0.7$ , two-way RM ANOVA per session, group effect. (C) Percent CS-period freezing in 4-trial averaged blocks at Ext Test and fear renewal test (Renewal), in contexts B and A (top). Ext Test:  $t_{(9)} = 3.68$ ,  $P = 0.005$ ; Renewal:  $t_{(9)} = 0.6$ ,  $P = 0.6$ , unpaired  $t$ -tests. (D) Percent contextual freezing during first 3 minutes of context exposure in each session. Context A Test (contextual fear memory test):  $t_{(9)} = 1.4$ ,  $P = 0.2$ ; Context B Test (novel context fear discrimination test):  $t_{(9)} = 3.0$ ,  $P = 0.015$ ; Ext Test (extinction memory test in context B):  $t_{(9)} = 1.24$ ,  $P = 0.2$ , unpaired  $t$ -tests. Mice, EYFP<sup>BLA→vH</sup>  $n = 6$ , ArchT<sup>BLA→vH</sup>  $n = 5$ . Data are presented as mean  $\pm$  s.e.m. \*  $P < 0.05$ , \*\*  $P < 0.01$ .

**Figure S3**

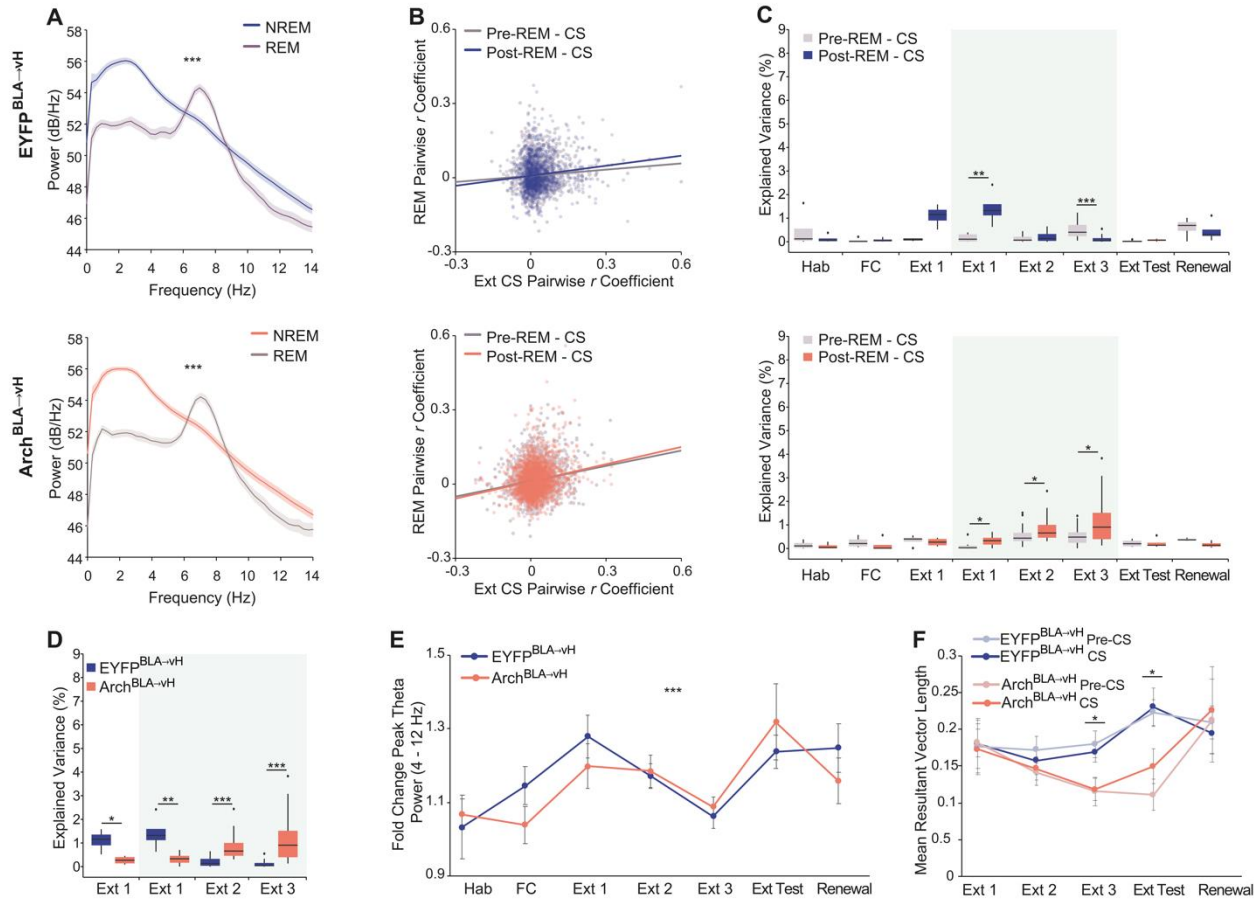

**Fig. S3. Reactivation of CS-period activity during REM sleep and CS-evoked theta power across fear extinction.**

(A) Power spectral density estimates for NREM and REM sleep periods. Period effect: EYFP<sup>BLA→vH</sup>,  $F_{(1,28)} = 17.38$ ,  $P = 0.0003$ ; Arch<sup>BLA→vH</sup>,  $F_{(1,28)} = 24.05$ ,  $P < 0.0001$ , two-way RM ANOVA. (B) Pairwise correlations for CS-period activity at Ext sessions versus for Pre-REM or Post-REM sleep. EYFP<sup>BLA→vH</sup>:  $n = 1407$  pairs, Pre-REM-CS  $r = 0.09$ ,  $P = 0.0014$ , Post-REM-CS  $r = 0.12$ ,  $P = 7 \times 10^{-7}$ ; Arch<sup>BLA→vH</sup>:  $n = 2649$  pairs, Pre-REM-CS  $r = 0.18$ ,  $P = 1.7 \times 10^{-20}$ , Post-REM-CS  $r = 0.19$ ,  $P = 1.3 \times 10^{-23}$ , Pearson's  $r$ . Pre-REM-CS versus Post-REM-CS: EYFP<sup>BLA→vH</sup>  $Z = -0.96$ ,  $P = 0.34$ ; Arch<sup>BLA→vH</sup>  $Z = -0.59$ ,  $P = 0.56$ , Steiger's  $Z$  test. (C) Explained variance of pairwise correlations between CS and Pre-REM versus CS and Post-REM. EYFP<sup>BLA→vH</sup>: Ext 1 light trials,  $P = 0.0078$ ; Ext 2,  $P = 0.16$ ; Ext 3,  $P < 0.00001$ ; Arch<sup>BLA→vH</sup>: Ext 1 light trials,  $P = 0.0391$ ; Ext 2:  $P = 0.037$ ; Ext 3,  $P = 0.0177$ , Wilcoxon signed-rank test. (D) Explained variance of pairwise correlations between CS and Post-REM comparing EYFP<sup>BLA→vH</sup> versus Arch<sup>BLA→vH</sup>. Ext 1 No-light trials:  $P = 0.0286$ , Ext 1 light trials:  $P = 0.0003$ , Ext 2:  $P < 0.00001$ , Ext 3:  $P < 0.00001$ , Wilcoxon rank-sum test. (E) Fold change in peak relative power between 4-12 Hz. Session effect:  $F_{(4,2,117.9)} = 5.28$ ,  $P = 0.0005$ , two-way RM ANOVA. Hab vs. Ext 1:  $P = 0.0337$ , Ext 1 vs. Ext 3:  $P = 0.0017$ , Ext 2 vs. Ext 3:  $P = 0.0054$ , Ext 3 vs. Ext Test:  $P = 0.0119$ , Tukey's post-hoc test. EYFP<sup>BLA→vH</sup>  $n = 15$  mice; Arch<sup>BLA→vH</sup>  $n = 15$  mice. (F) Mean resultant vector length of Ext Test CS-active theta-coupled neurons across extinction sessions and fear renewal. EYFP<sup>BLA→vH</sup> vs. Arch<sup>BLA→vH</sup> for Pre-CS period: Ext 3,  $P = 0.0325$ ; Ext Test,  $P = 0.0028$ ; for CS period (indicated by asterisk): Ext 3,  $P = 0.015$ ; Ext Test,  $P = 0.032$ , Wilcoxon rank-sum test.

**Figure S4**

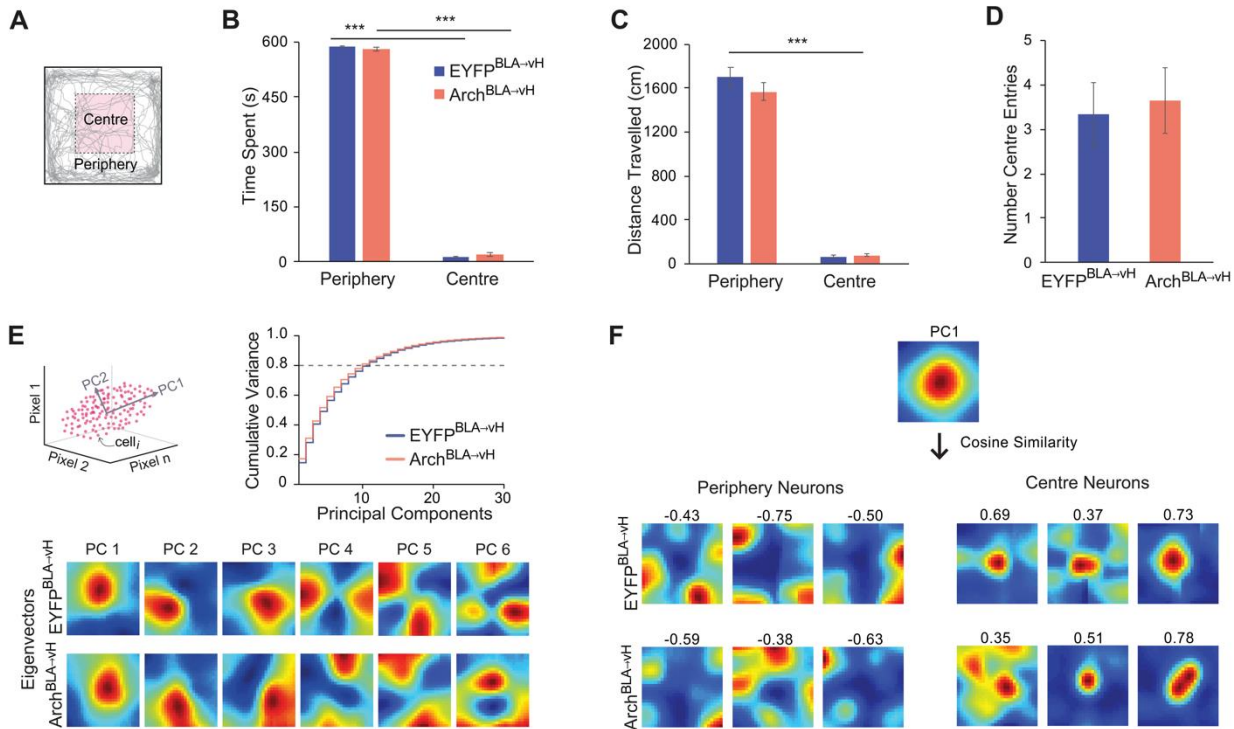

**Fig. S4. Centre behaviour and categorization of zone-active neurons at extinction test.** (A) Representative tracking plot at Ext Test. (B) Time spent in each zone. EYFP<sup>BLA→vH</sup> vs. Arch<sup>BLA→vH</sup>:  $t_{(24)} = 1.35$ ,  $P = 0.19$ , unpaired  $t$ -test. EYFP<sup>BLA→vH</sup>:  $t_{(11)} = 26.68$ ,  $P < 0.0001$ ; Arch<sup>BLA→vH</sup>:  $t_{(13)} = 15.98$ ,  $P < 0.0001$ , one-sample  $t$ -test against chance level. (C) Distance travelled in each zone, Zone effect:  $F_{(1,24)} = 691.6$ ,  $P < 0.0001$ , two-way RM ANOVA; periphery:  $P = 0.25$ , centre:  $P = 0.98$ , Sidak post-hoc test. (D) Number of entries into the centre zone,  $t_{(24)} = 0.3$ ,  $P = 0.77$ . b-d, Mice, EYFP<sup>BLA→vH</sup>  $n = 12$ , Arch<sup>BLA→vH</sup>  $n = 14$ . (E) Top left, schematic of the spatial firing rate pixel space on which principal component analysis (PCA) was performed. Top right, cumulative proportion of variance explained by principal components. Bottom, first 6 principal components of the spatial firing rate maps at Ext Test ( $n = 364$  neurons, 676 pixels). (F) Schematic of zone categorization approach. Top, first principal component using all sessions and neurons from both EYFP<sup>BLA→vH</sup> and Arch<sup>BLA→vH</sup>. Bottom, examples of spatial maps from neurons categorized as periphery- or centre-active and the correlation of their firing with PC1.

**Figure S5**

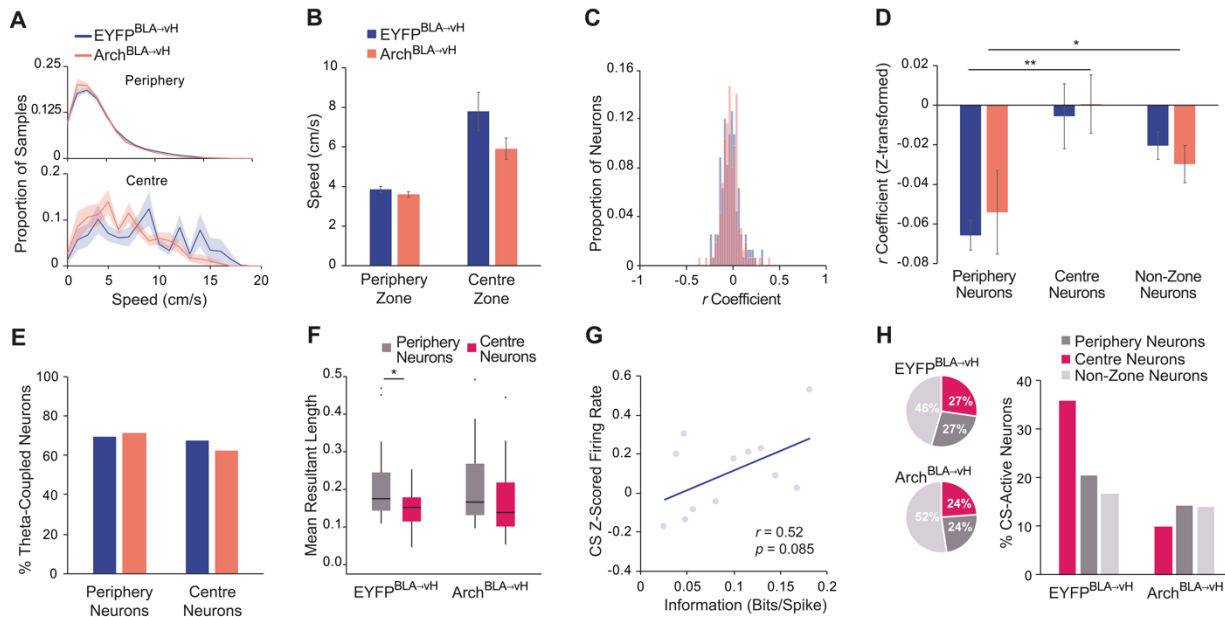

**Fig. S5. Speed modulation, theta coupling, and CS-relevant activity of periphery and centre neurons.** (A) Histogram of samples tracked across speeds in the periphery (top) and centre (bottom) zones. Group effect: Periphery  $F_{(1,24)} = 0.7, P = 0.41$ ; Centre  $F_{(1,24)} = 0.14, P = 0.71$ ; two-way RM ANOVA. (B) Mean speed of EYFP<sup>BLA→vH</sup> and Arch<sup>BLA→vH</sup> mice in periphery and centre. Group x Zone interaction:  $F_{(1,24)} = 2.28, P = 0.14$ ; two-way ANOVA. A-B, EYFP<sup>BLA→vH</sup>:  $n = 12$  mice, Arch<sup>BLA→vH</sup>:  $n = 14$  mice. (C) Top, percentage of speed-modulated neurons. Bottom, proportion of neurons with given Pearson's  $r$  correlation between firing rate and speed. EYFP<sup>BLA→vH</sup> vs. Arch<sup>BLA→vH</sup>:  $P = 0.43$ , Kolmogorov-Smirnov. EYFP<sup>BLA→vH</sup>:  $n = 158$  neurons, Arch<sup>BLA→vH</sup>:  $n = 163$  neurons. (D) Mean Fisher's Z-transformed  $r$  coefficient for periphery, centre, or non-zone neurons. Group effect:  $F_{(1,315)} = 0.05, P = 0.82$ ; Zone effect:  $F_{(2,315)} = 6.15, P = 0.0024$ ; two-way ANOVA. Periphery vs. Centre:  $P = 0.002$ ; Periphery vs. Non-Zone:  $P = 0.032$ ; Tukey's post-hoc test. (E) Percentage of periphery and centre neurons that are theta-coupled, Rayleigh's test. (F) MRL of theta-coupled zone neurons. EYFP<sup>BLA→vH</sup>:  $P = 0.0441$ ; Arch<sup>BLA→vH</sup>:  $P = 0.16$ , Wilcoxon rank-sum test. (G) Association between spatial information content and mean normalized firing rate during CS-period of Ext Test.  $r = 0.52, P = 0.0851$ , Pearson's  $r$ . Measures averaged across all neurons from individual EYFP<sup>BLA→vH</sup> mice ( $n = 12$ ) at Ext Test, data points are for each mouse. (H) Left, pie charts show proportion of CS-active neurons that were also categorized as zone neurons. Right, proportion of each zone population categorized as CS-active. E,F,H, Periphery neurons: EYFP<sup>BLA→vH</sup>  $n = 44$ , Arch<sup>BLA→vH</sup>  $n = 35$ ; centre neurons: EYFP<sup>BLA→vH</sup>  $n = 25$ , Arch<sup>BLA→vH</sup>  $n = 50$ ; Non-Zone neurons: EYFP<sup>BLA→vH</sup>  $n = 89$ , Arch<sup>BLA→vH</sup>  $n = 78$ .
